# Supplementary material
Source: PubMed Central journal article supplement (PMC8805511)
Supplement: NIHMS1774016-supplement-1.pdf [file NIHMS1774016-supplement-1.pdf]

## Supplemental Information

### Inhibitors of Heat Shock Protein 70 (Hsp70) with Enhanced Metabolic Stability

#### Reduce Tau Levels

Hao Shao<sup>a\*</sup>, Xiaokai Li<sup>b, c</sup>, Shigenari Hayashi<sup>c</sup>, Jeanette L. Bertron<sup>b, c</sup>, Daniel M. C. Schwarz<sup>b, c</sup>, Benjamin C. Tang<sup>c</sup> and Jason E. Gestwicki<sup>b, c,\*</sup>

<sup>a</sup>Hunan Key Laboratory of Molecular Precision Medicine, Department of Oncology, Xiangya Hospital, Central South University, Changsha, Hunan, China, 410008

<sup>b</sup>Department of Pharmaceutical Chemistry and the <sup>c</sup>Institute for Neurodegenerative Disease, University of California San Francisco, San Francisco, CA 94158

#### Experimental section

##### Compound Characterization

Solvents and starting materials were purchased from commercial sources and used without further purification. <sup>1</sup>H-NMR and <sup>13</sup>C-NMR were recorded on Varian 400 MHz, 500 MHz, or 600 MHz spectrometer. Splitting patterns are indicated as follows: s, singlet; d, doublet; t, triplet; m, multiplet; q, quartet. ESI-MS was recorded on Micromass LCT Time-of-Flight mass spectrometer.

(2*Z*,5*E*)-3-ethyl-5-(4-fluoro-3-methylbenzo[*d*]thiazol-2(3*H*)-ylidene)-2-(pyridin-2-ylmethylene)thiazolidin-4-one (**Compd 1**). Purity: 97%. <sup>1</sup>H *d*<sub>6</sub>-DMSO (400 MHz) 8.49 (d, *J* = 4.4 Hz, 1H), 7.60 (t, *J* = 7.6 Hz, 1H), 7.46 (d, *J* = 7.6 Hz, 1H), 7.25-7.05 (m, 3H), 6.95-6.88 (m, 1H), 6.19 (s, 1H), 4.02 (s, 3H), 3.87 (q, *J* = 7.2 Hz, 2H), 1.17 (t, *J* = 7.2 Hz, 3H). <sup>13</sup>C *d*<sub>6</sub>-DMSO (150 MHz) 165.21, 155.75, 150.03, 147.43, 139.73, 135.90, 129.38,

123.58, 122.11, 117.83, 117.64, 114.22, 100.15, 94.11, 90.43, 85.79, 40.06, 37.26, 12.13.

ESI-MS: m/z calculated for  $[C_{19}H_{17}FN_3OS_2]^+$ , 386.079, found 386.102  $[M+H]^+$ .

(2*Z*,5*E*)-3-ethyl-5-(5-fluoro-3-methylbenzo[*d*]thiazol-2(3*H*)-ylidene)-2-(pyridin-2-ylmethylene)thiazolidin-4-one (**Compd 2**). Purity: 96%.  $^1H$  *d6*-DMSO (400 MHz) 8.54 (s, 1H), 7.72-7.57 (m, 2H), 7.35-7.20 (m, 2H), 7.02-6.90 (m, 2H), 6.21 (s, 1H), 3.94 (s, 3H), 3.90 (q,  $J = 7.2$  Hz, 2H), 1.20 (t,  $J = 7.2$  Hz, 3H).  $^{13}C$  *d6*-DMSO (100 MHz) 165.17, 160.50, 155.82, 151.69, 147.30, 142.14, 139.78, 135.94, 134.36, 122.78, 122.01, 121.21, 117.61, 109.29, 98.48, 93.79, 37.20, 34.60, 12.12. ESI-MS: m/z calculated for  $[C_{19}H_{17}FN_3OS_2]^+$ , 386.079, found 386.065  $[M+H]^+$ .

(2*Z*,5*E*)-3-ethyl-5-(6-fluoro-3-methylbenzo[*d*]thiazol-2(3*H*)-ylidene)-2-(pyridin-2-ylmethylene)thiazolidin-4-one (**Compd 3**). Purity: 97%.  $^1H$  *d6*-DMSO (500 MHz) 8.53 (d,  $J = 4.0$  Hz, 1H), 7.66-7.59 (m, 2H), 7.32 (dd,  $J = 9.0, 4.0$  Hz, 1H), 7.25-7.17 (m, 2H), 6.94 (t,  $J = 6.0$  Hz, 1H), 6.19 (s, 1H), 3.93 (s, 3H), 3.88 (q,  $J = 7.0$  Hz, 2H), 1.19 (t,  $J = 7.0$  Hz, 3H).  $^{13}C$  *d6*-DMSO (150 MHz) 165.14, 158.68, 157.34, 156.06, 149.95, 147.41, 140.09, 137.65, 135.86, 127.76, 122.00, 117.43, 111.31, 108.72, 93.62, 84.30, 37.17, 34.57, 12.11. ESI-MS: m/z calculated for  $[C_{19}H_{17}FN_3OS_2]^+$ , 386.079, found 386.082  $[M+H]^+$ .

(2*Z*,5*E*)-3-ethyl-5-(7-fluoro-3-methylbenzo[*d*]thiazol-2(3*H*)-ylidene)-2-(pyridin-2-ylmethylene)thiazolidin-4-one (**Compd 4**). Purity: 96%.  $^1H$  *d6*-DMSO (400 MHz) 8.54 (d,  $J = 4.8$  Hz, 1H), 6.33 (td,  $J = 8.0, 1.6$  Hz, 1H), 7.43-7.35 (m, 1H), 7.25 (d,  $J = 8.0$  Hz,

1H), 7.19 (d,  $J = 8.0$  Hz, 1H), 7.04 (t,  $J = 8.4$  Hz, 1H), 6.98-6.92 (m, 1H), 6.23 (s, 1H), 3.96 (s, 3H), 3.90 (q,  $J = 7.2$  Hz, 2H), 1.21 (t,  $J = 7.2$  Hz, 3H).  $^{13}\text{C}$   $d_6$ -DMSO (100 MHz) 165.70, 157.46, 156.15, 155.05, 149.02, 147.86, 144.31, 140.18, 136.35, 128.85, 122.55, 118.07, 112.83, 109.31, 107.36, 94.62, 37.71, 35.13, 12.54. ESI-MS:  $m/z$  calculated for  $[\text{C}_{19}\text{H}_{17}\text{FN}_3\text{OS}_2]^+$ , 386.079, found 386.048  $[\text{M}+\text{H}]^+$ .

(2*Z*,5*E*)-5-(4-chloro-3-methylbenzo[*d*]thiazol-2(3*H*)-ylidene)-3-ethyl-2-(pyridin-2-ylmethylene)thiazolidin-4-one (**Compd 5**). Purity: 97%.  $^1\text{H}$   $d_6$ -DMSO (400 MHz) 8.54 (d,  $J = 4.4$  Hz, 1H), 7.67-7.58 (m, 2H), 7.35 (d,  $J = 8.0$  Hz, 1H), 7.27 (d,  $J = 8.0$  Hz, 1H), 7.14 (t,  $J = 8.0$  Hz, 1H), 6.98 (t,  $J = 6.0$  Hz, 1H), 6.26 (s, 1H), 3.99 (s, 3H), 3.90 (q,  $J = 7.2$  Hz, 2H), 1.21 (t,  $J = 7.2$  Hz, 3H).  $^{13}\text{C}$   $d_6$ -DMSO (100 MHz) 165.13, 155.60, 150.74, 147.44, 139.53, 135.98, 129.70, 128.60, 124.19, 122.22, 120.58, 117.87, 116.39, 94.73, 88.63, 40.17, 40.06, 37.30, 17.17. ESI-MS:  $m/z$  calculated for  $[\text{C}_{19}\text{H}_{17}\text{ClN}_3\text{OS}_2]^+$ , 402.050, found 402.020  $[\text{M}+\text{H}]^+$ .

(2*Z*,5*E*)-5-(5-chloro-3-methylbenzo[*d*]thiazol-2(3*H*)-ylidene)-3-ethyl-2-(pyridin-2-ylmethylene)thiazolidin-4-one (**Compd 6**). Purity: 99%.  $^1\text{H}$   $d_6$ -DMSO (400 MHz) 8.54 (d,  $J = 4.4$  Hz, 1H), 7.67 (d,  $J = 8.0$  Hz, 1H), 7.63 (t,  $J = 8.0$  Hz, 1H), 7.46 (s, 1H), 7.25 (d,  $J = 8.0$  Hz, 1H), 7.17 (d,  $J = 8.4$  Hz, 1H), 6.95 (t,  $J = 5.2$  Hz, 1H), 6.22 (s, 1H), 3.94 (s, 3H), 3.90 (q,  $J = 7.2$  Hz, 2H), 1.20 (t,  $J = 7.2$  Hz, 3H). ESI-MS:  $m/z$  calculated for  $[\text{C}_{19}\text{H}_{17}\text{ClN}_3\text{OS}_2]^+$ , 402.050, found 402.021  $[\text{M}+\text{H}]^+$ .

(2*Z*,5*E*)-5-(6-chloro-3-methylbenzo[*d*]thiazol-2(3*H*)-ylidene)-3-ethyl-2-(pyridin-2-ylmethylene)thiazolidin-4-one (**Compd 7**). Purity: 97%. <sup>1</sup>H *d*6-DMSO (400 MHz) δ 8.53 (d, *J* = 4.8 Hz, 1H), 7.80 (d, *J* = 2.4 Hz, 1H), 7.62 (td, *J* = 8.0, 2.4 Hz, 1H), 7.37 (dd, *J* = 8.8, 2.0 Hz, 1H), 7.30 (d, *J* = 8.8 Hz, 1H), 7.24 (d, *J* = 8.0 Hz, 1H), 6.97-6.92 (m, 1H), 6.19 (s, 1H), 3.92 (s, 3H), 3.89 (q, *J* = 7.2 Hz, 2H), 1.20 (t, *J* = 7.2 Hz, 3H). ESI-MS: *m/z* calculated for [C<sub>19</sub>H<sub>17</sub>ClN<sub>3</sub>OS<sub>2</sub>]<sup>+</sup>, 402.050, found 402.078 [M+H]<sup>+</sup>.

(2*Z*,5*E*)-5-(7-chloro-3-methylbenzo[*d*]thiazol-2(3*H*)-ylidene)-3-ethyl-2-(pyridin-2-ylmethylene)thiazolidin-4-one (**Compd 8**). Purity: 98%. <sup>1</sup>H *d*6-DMSO (400 MHz) δ 8.53 (d, *J* = 4.0 Hz, 1H), 7.64 (t, *J* = 7.6 Hz, 1H), 7.38 (t, *J* = 7.6 Hz, 1H), 7.30-7.15 (m, 3H), 6.96 (t, *J* = 5.2 Hz, 1H), 6.23 (s, 1H), 3.94 (s, 3H), 3.90 (q, *J* = 6.8 Hz, 2H), 1.21 (t, *J* = 6.8 Hz, 3H). ESI-MS: *m/z* calculated for [C<sub>19</sub>H<sub>17</sub>ClN<sub>3</sub>OS<sub>2</sub>]<sup>+</sup>, 402.050, found 402.062 [M+H]<sup>+</sup>.

(2*Z*,5*E*)-3-ethyl-5-(3-methylbenzo[*d*]thiazol-2(3*H*)-ylidene)-2-(pyridin-4-ylmethylene)thiazolidin-4-one (**Compd 9**). Purity: 97%. <sup>1</sup>H *d*6-DMSO (500 MHz) δ 8.43 (d, *J* = 5.0 Hz, 2H), 7.71 (d, *J* = 7.5 Hz, 1H), 7.42-7.38 (m, 2H), 7.29 (d, *J* = 5.0 Hz, 2H), 7.18 (t, *J* = 7.0 Hz, 1H), 6.02 (s, 1H), 3.94 (s, 3H), 3.90 (q, *J* = 7.6 Hz, 2H), 1.19 (t, *J* = 7.6 Hz, 3H). <sup>13</sup>C *d*6-DMSO (100 MHz) 164.42, 150.56, 149.29, 143.86, 140.73, 139.76, 126.60, 125.65, 122.72, 121.61, 120.76, 120.40, 110.82, 109.55, 92.71, 79.58, 37.17, 33.99, 12.06. ESI-MS: *m/z* calculated for [C<sub>19</sub>H<sub>18</sub>N<sub>3</sub>OS<sub>2</sub>]<sup>+</sup>, 368.089, found 368.063 [M+H]<sup>+</sup>.

(2*Z*,5*E*)-3-ethyl-5-(4-fluoro-3-methylbenzo[*d*]thiazol-2(3*H*)-ylidene)-2-(pyridin-4-ylmethylene)thiazolidin-4-one (**Compd 10**). Purity: 96%. <sup>1</sup>H *d*6-DMSO (400 MHz) 8.44 (dd, *J* = 4.4, 1.6 Hz, 1H), 7.53 (dd, *J* = 7.6, 1.2 Hz, 1H), 7.30 (dd, *J* = 4.4, 2.0 Hz, 1H), 7.26-7.12 (m, 2H), 6.07 (s, 1H), 4.04 (s, 3H), 3.89 (q, *J* = 7.2 Hz, 2H), 1.19 (t, *J* = 7.2 Hz, 3H). ESI-MS: *m/z* calculated for [C<sub>19</sub>H<sub>17</sub>FN<sub>3</sub>OS<sub>2</sub>]<sup>+</sup>, 386.079, found 386.504 [M+H]<sup>+</sup>.

(2*Z*,5*E*)-3-ethyl-5-(5-fluoro-3-methylbenzo[*d*]thiazol-2(3*H*)-ylidene)-2-(pyridin-4-ylmethylene)thiazolidin-4-one (**Compd 11**). Purity: 98%. <sup>1</sup>H *d*6-DMSO (400 MHz) δ 8.44 (apparent d, *J* = 6.0 Hz, 2H), 7.71 (dd, *J* = 8.4, 5.6 Hz, 1H), 7.41 (dd, *J* = 10.4, 2.4 Hz, 1H), 7.30 (apparent d, *J* = 6.4 Hz, 2H), 7.02 (td, *J* = 8.8, 2.4 Hz, 1H), 6.04 (s, 1H), 3.93 (s, 3H), 3.89 (q, *J* = 7.2 Hz, 2H), 1.18 (t, *J* = 7.2 Hz, 3H). ESI-MS: *m/z* calculated for [C<sub>19</sub>H<sub>17</sub>FN<sub>3</sub>OS<sub>2</sub>]<sup>+</sup>, 386.079, found 386.038 [M+H]<sup>+</sup>.

(2*Z*,5*E*)-3-ethyl-5-(6-fluoro-3-methylbenzo[*d*]thiazol-2(3*H*)-ylidene)-2-(pyridin-4-ylmethylene)thiazolidin-4-one (**Compd 12**). Purity: 96%. <sup>1</sup>H *d*6-DMSO (400 MHz) δ 8.41 (dd, *J* = 4.8, 1.6 Hz, 2H), 7.65 (dd, *J* = 8.0, 2.4 Hz, 1H), 7.38 (dd, *J* = 8.4, 4.0 Hz, 1H), 7.27 (dd, *J* = 4.8, 1.6 Hz, 2H), 7.20 (td, *J* = 8.8, 2.8 Hz, 1H), 6.00 (s, 1H), 3.91 (s, 3H), 3.86 (q, *J* = 7.2 Hz, 2H), 1.16 (t, *J* = 7.2 Hz, 3H). <sup>13</sup>C *d*6-DMSO (100 MHz) 164.51, 151.53, 149.41, 149.23, 143.71, 139.78, 137.49, 127.10, 120.80, 113.68, 113.43, 111.66, 109.09, 108.82, 92.91, 79.78, 37.21, 34.32, 12.07. ESI-MS: *m/z* calculated for [C<sub>19</sub>H<sub>17</sub>FN<sub>3</sub>OS<sub>2</sub>]<sup>+</sup>, 386.079, found 386.089 [M+H]<sup>+</sup>.

(2*Z*,5*E*)-3-ethyl-5-(7-fluoro-3-methylbenzo[*d*]thiazol-2(3*H*)-ylidene)-2-(pyridin-4-ylmethylene)thiazolidin-4-one (**Compd 13**). Purity: 95%. <sup>1</sup>H *d*6-DMSO (400 MHz) δ

8.44 (apparent d,  $J = 6.0$  Hz, 2H), 7.46-7.39 (m, 1H), 7.32 (apparent d,  $J = 6.0$  Hz, 2H), 7.28 (d,  $J = 8.0$  Hz, 1H), 7.07 (t,  $J = 8.8$  Hz, 1H), 6.06 (s, 1H), 3.96 (s, 3H), 3.90 (q,  $J = 7.2$  Hz, 2H), 1.19 (t,  $J = 7.2$  Hz, 3H). ESI-MS:  $m/z$  calculated for  $[C_{19}H_{17}FN_3OS_2]^+$ , 386.079, found 386.009  $[M+H]^+$ .

(2*Z*,5*E*)-5-(4-chloro-3-methylbenzo[*d*]thiazol-2(3*H*)-ylidene)-3-ethyl-2-(pyridin-4-ylmethylene)thiazolidin-4-one (**Compd 14**). Purity: 98%.  $^1H$  *d*6-DMSO (400 MHz)  $\delta$  8.46 (d,  $J = 5.5$  Hz, 2H), 7.70 (d,  $J = 7.7$  Hz, 1H), 7.40 (d,  $J = 8.0$  Hz, 1H), 7.36 (d,  $J = 4.9$  Hz, 2H), 7.18 (t,  $J = 7.8$  Hz, 1H), 6.14 (s, 1H), 4.03 (s, 3H), 3.91 (q,  $J = 7.1$  Hz, 2H), 1.20 (t,  $J = 7.0$  Hz, 3H). ESI-MS:  $m/z$  calculated for  $[C_{19}H_{17}ClN_3OS_2]^+$ , 402.050, found 401.878  $[M+H]^+$ .

(2*Z*,5*E*)-5-(5-chloro-3-methylbenzo[*d*]thiazol-2(3*H*)-ylidene)-3-ethyl-2-(pyridin-4-ylmethylene)thiazolidin-4-one (**Compd 15**). Purity: 98%.  $^1H$  *d*6-DMSO (400 MHz)  $\delta$  8.44 (apparent d,  $J = 6.0$  Hz, 2H), 7.72 (d,  $J = 8.0$  Hz, 2H), 7.56 (s, 1H), 7.31 (apparent d,  $J = 5.6$  Hz, 2H), 7.28 (apparent d,  $J = 8.4$  Hz, 1H), 6.05 (s, 1H), 3.94 (s, 3H), 3.89 (q,  $J = 7.2$  Hz, 2H), 1.18 (t,  $J = 7.2$  Hz, 3H). ESI-MS:  $m/z$  calculated for  $[C_{19}H_{17}ClN_3OS_2]^+$ , 402.050, found 402.011  $[M+H]^+$ .

(2*Z*,5*E*)-5-(6-chloro-3-methylbenzo[*d*]thiazol-2(3*H*)-ylidene)-3-ethyl-2-(pyridin-4-ylmethylene)thiazolidin-4-one (**Compd 16**). Purity: 97%.  $^1H$  *d*6-DMSO (400 MHz)  $\delta$  8.43 (apparent d,  $J = 6.0$  Hz, 2H), 7.83 (s, 1H), 7.37 (apparent s, 2H), 7.28 (d,  $J = 5.6$  Hz,

2H), 6.01 (s, 1H), 3.90 (s, 3H), 3.87 (q,  $J = 7.2$  Hz, 2H), 1.18 (t,  $J = 7.2$  Hz, 3H). ESI-MS:  $m/z$  calculated for  $[C_{19}H_{17}ClN_3OS_2]^+$ , 402.050, found 401.850  $[M+H]^+$ .

(2*Z*,5*E*)-5-(7-chloro-3-methylbenzo[*d*]thiazol-2(3*H*)-ylidene)-3-ethyl-2-(pyridin-4-ylmethylene)thiazolidin-4-one (**Compd 17**). Purity: 98%.  $^1H$  *d*<sub>6</sub>-DMSO (400 MHz)  $\delta$  8.46 (d,  $J = 5.7$  Hz, 2H), 7.82 (apparent d,  $J = 3.9$  Hz, 1H) 7.46-7.41 (m, 3H), 7.31 (apparent s, 1H), 6.20 (s, 1H), 3.98 (s, 3H), 3.96 (q,  $J = 8.0$  Hz, 2H), 1.21 (t,  $J = 7.0$  Hz, 3H). ESI-MS:  $m/z$  calculated for  $[C_{19}H_{17}ClN_3OS_2]^+$ , 402.050, found 401.934  $[M+H]^+$ .

### Metabolic stability assay

Metabolic stability was assessed after incubation with mouse liver microsomes. Briefly, test compounds (1  $\mu$ M) were incubated with mouse liver microsomes (Xenotech Sekisui) at 0.5 mg/mL in 100 mM potassium phosphate buffer at 37 °C with an NADPH regeneration system. Aliquots are collected at various time points and quenched in an ice cold methanol:acetonitrile mixture (1:1 v/v) containing niflumic acid as an internal standard. Quenched solutions were then filtered (Captiva, Agilent) before analysis by LC/MS-MS. Stability was quantified by determination of the ratio of the peak areas for the compound peak : internal standard, normalized to the relevant initial ( $t = 0$ ) time point. Half-lives were obtained by fitting the time course data. Samples without the NADPH regeneration system were used as negative controls.

### Cell culture and immunoblotting

HeLaC3 and SH-SY5Y cells were cultured in supplemented Opti-MEM media at 37 °C, as described<sup>1</sup>. Cells were cultured in 6-well plates and treated with compounds at the indicated concentrations for 24 h before lysis with RIPA buffer supplemented with protease inhibitor (Sigma). After quantification of total protein concentration, normalized amounts of lysate were separated by 10% SDS-PAGE, transferred to nitrocellulose and then the proteins of interests were identified by Western blot, as described<sup>1</sup>.

## **Reference**

1. Young ZT, Rauch JN, Assimon VA, et al. Stabilizing the Hsp70-Tau Complex Promotes Turnover in Models of Tauopathy. *Cell Chem Biol.* 2016;23(8): 992-1001.
